# Supplementary material for: Potential of Urine Biomarkers CHI3L1, NGAL, TIMP-2, IGFBP7, and Combinations as Complementary Diagnostic Tools for Acute Kidney Injury after Pediatric Cardiac Surgery: A Prospective Cohort Study
Source: MDPI journal article supplement (doi:10.3390/diagnostics13061047), 2023-03-09
Supplement: s1 [file s1]

**Suppl. Figure S1: Schwartz estimate formula**

GFR: glomerular filtration rate [18].

$$GFR \left( \frac{ml}{min} \text{ per } 1.73 \text{ square m} \right) = k * \frac{L (cm)}{SCr \left( \frac{mg}{dl} \right)}$$

$L = length$

$k = coefficient$

$k = 0.33$  in preterm infants (gestational age at birth < 38 weeks)

$k = 0.45$  in full-term infants

$k = 0.55$  in children ( $\geq 1$  and < 13 years old) adolescent ( $\geq 13$  y and < 21 y) girls

$k = 0.70$  in adolescent boys
