# Supplementary material for: Potential of Urine Biomarkers CHI3L1, NGAL, TIMP-2, IGFBP7, and Combinations as Complementary Diagnostic Tools for Acute Kidney Injury after Pediatric Cardiac Surgery: A Prospective Cohort Study
Source: MDPI journal article supplement (doi:10.3390/diagnostics13061047), 2023-03-09
Supplement: s1 [file s1]

**Supplementary Table S1: Dilution of serum and urine samples for the initial measurement of CHI3L1 by ELISA**

CHI3L1: chitinase 3-like protein 1; ELISA: enzyme-linked immunosorbent assay

| <b>Time point of the study</b> | <b>Estimated dilution for serum sample</b> | <b>Estimated dilution for urine sample</b> |
|--------------------------------|--------------------------------------------|--------------------------------------------|
| t0                             | 1/10                                       | 1/2                                        |
| t1                             | 1/10                                       | 1/2                                        |
| t2                             | 1/20                                       | 1/2                                        |
| t3                             | 1/20                                       | 1/2                                        |
| t4                             | 1/20                                       | 1/2                                        |
| t5                             | 1/20                                       | 1/2                                        |
| t6                             | 1/20                                       | 1/2                                        |
| t7                             | 1/20                                       | 1/2                                        |

**Supplementary Table S2: Adjustment of NGAL concentrations before input in statistical programs**

LOD: limit of detection; LOQ: limit of quantification; NGAL: neutrophil gelatinase-associated lipocalin

| <b>Measured NGAL</b> | <b>Reported NGAL (ng/ml)</b> |
|----------------------|------------------------------|
| < LOD15              | 0.1                          |
| = LOD15              | 15.0                         |
| > LOD15 and < LOQ25  | Median (LOD15, LOQ25) = 20.0 |
| ≥ LOQ25              | Measured NGAL                |

**Supplementary Table S3: Adjustment of urine IGFBP7 concentrations before input in statistical programs**

AKIRisk: urine [TIMP-2]•[IGFBP7]; IGFBP7: insulin-like growth factor-binding protein 7; LL: lower limit of measurable range; TIMP-2: tissue inhibitor of metalloproteinases-2

| Measured IGFBP7 | Reported IGFBP7 (ng/ml)             |
|-----------------|-------------------------------------|
| < LL20          | $\frac{[AKIRisk] * 1000}{[TIMP-2]}$ |

**Supplementary Table S4: Additional pediatric patient health characteristics**

ACE: angiotensin converting enzyme; AKI: acute kidney injury; CI: confidence interval; CRP: C-reactive protein; dCS: day of cardiac surgery; dPO1 postoperative day 1; h: hour; IQR: interquartile range; KDIGO: Kidney Disease Improving Global Outcomes; no: number; NSAID: nonsteroidal anti-inflammatory drug; PELOD: pediatric logistic organ dysfunction; SCr: serum creatinine, UO: urine output.

|                                                       | dCS                       |                                                          |                                   |         | dPO1                      |                                                          |                                   |         | dPO2                      |                                                          |                                   |         |
|-------------------------------------------------------|---------------------------|----------------------------------------------------------|-----------------------------------|---------|---------------------------|----------------------------------------------------------|-----------------------------------|---------|---------------------------|----------------------------------------------------------|-----------------------------------|---------|
|                                                       | All patients<br>(n = 101) | AKI stage<br>≥ 1 <sup>a</sup> within<br>48-h<br>(n = 63) | No AKI<br>within 48-h<br>(n = 38) | P value | All patients<br>(n = 101) | AKI stage<br>≥ 1 <sup>a</sup> within<br>48-h<br>(n = 63) | No AKI<br>within 48-h<br>(n = 38) | P value | All patients<br>(n = 101) | AKI stage<br>≥ 1 <sup>a</sup> within<br>48-h<br>(n = 63) | No AKI<br>within 48-h<br>(n = 38) | P value |
| <b>Postoperative clinical examination (IQR)</b>       |                           |                                                          |                                   |         |                           |                                                          |                                   |         |                           |                                                          |                                   |         |
| PELOD score<br>(n = 100, 99, 87)                      | 5 (3-7)                   | 5 (4-7)                                                  | 4 (1-6)                           | 0.002   | 2 (0-5)                   | 4 (2-5)                                                  | 1 (0-2)                           | < 0.001 | 1 (0-3)                   | 2 (1-4)                                                  | 0 (0-2)                           | < 0.001 |
| Serum CRP – mg/l<br>(n = 101, 101, 89)                | 2.2 (0.6-5.8)             | 2.3 (0.6-5.6)                                            | 1.9 (0.6-6.1)                     | 0.961   | 23.9 (14.3-40.7)          | 22.5 (11.3-40.3)                                         | 27.8 (16.3-42.1)                  | 0.398   | 36.0 (18.7-70.7)          | 36.1 (18.6-58.7)                                         | 35.7 (18.3-78.7)                  | 0.750   |
| Fluid balance – ml<br>(n = 101, 101, 88)              | 167 (40-356)              | 170 (68-300)                                             | 165 (38-537)                      | 0.697   | 171 (24-315)              | 171 (78-353)                                             | 164 (202neg-274)                  | 0.202   | 47 (68neg-143)            | 66 (31neg-150)                                           | 1 (192neg-137)                    | 0.041   |
| <b>Postoperative transfusions – no. (%) [95 % CI]</b> |                           |                                                          |                                   |         |                           |                                                          |                                   |         |                           |                                                          |                                   |         |

|                                                              |                          |                          |                         |       |                          |                          |                        |       |                          |                          |                        |       |
|--------------------------------------------------------------|--------------------------|--------------------------|-------------------------|-------|--------------------------|--------------------------|------------------------|-------|--------------------------|--------------------------|------------------------|-------|
| Whole blood                                                  | 20 (19.8)<br>[13.2-28.6] | 18 (28.6)<br>[18.9-40.7] | 2 (5.3)<br>[1.5-17.3]   | 0.004 | 15 (14.9)<br>[9.2-23.1]  | 13 (20.6)<br>[12.5-32.2] | 2 (5.3)<br>[1.5-17.3]  | 0.044 | 8 (7.9)<br>[4.1-14.9]    | 7 (11.1)<br>[5.5-21.2]   | 1 (2.6)<br>[0.5-13.5]  | 0.253 |
| Plasma                                                       | 40 (39.6)<br>[30.6-49.4] | 32 (50.8)<br>[38.8-62.7] | 8 (21.1)<br>[11.1-36.3] | 0.003 | 13 (12.9)<br>[7.7-20.8]  | 11 (17.5)<br>[10.0-28.6] | 2 (5.3)<br>[1.5-17.3]  | 0.123 | 2 (2.0)<br>[0.5-6.9]     | 2 (3.2)<br>[0.9-10.9]    | 0 (0.0)<br>[0.0-9.2]   | 0.526 |
| Platelets                                                    | 4 (4.0)<br>[1.6-9.7]     | 4 (6.3)<br>[2.5-15.2]    | 0 (0.0)<br>[0.0-9.2]    | 0.294 | 2 (2.0)<br>[0.5-6.9]     | 2 (3.2)<br>[0.9-10.9]    | 0 (0.0)<br>[0.0-9.2]   | 0.526 | 3 (3.0)<br>[1.0-8.4]     | 3 (4.8)<br>[1.6-13.1]    | 0 (0.0)<br>[0.0-9.2]   | 0.289 |
| <b>Postoperative<br/>volumes transfused<br/>(IQR) – ml</b>   |                          |                          |                         |       |                          |                          |                        |       |                          |                          |                        |       |
| Whole blood<br>(n = 20, 15, 8)                               | 43 (23-68)               | 48 (38-73)               | 20 (20-20)              | 0.063 | 40 (30-50)               | 40 (35-53)               | 35 (30-NA)             | 0.476 | 25 (20-78)               | 20 (20-90)               | 40 (40-40)             | 0.750 |
| Plasma<br>(n = 40, 13, 2)                                    | 50 (40-80)               | 55 (40-95)               | 45 (27-78)              | 0.415 | 60 (20-93)               | 20 (20-75)               | 94 (60-NA)             | 0.308 | 145 (50-NA)              | 145 (50-NA)              | NA                     | NA    |
| Platelets<br>(n = 4, 2, 3)                                   | 55 (43-241)              | 55 (43-241)              | NA                      | NA    | 188 (50-NA)              | 188 (50-NA)              | NA                     | NA    | 140 (108-NA)             | 140 (108-NA)             | NA                     | NA    |
| <b>Postoperative<br/>antibiotics – no.<br/>(%) [95 % CI]</b> |                          |                          |                         |       |                          |                          |                        |       |                          |                          |                        |       |
| Any antibiotic                                               | 11 (10.9)<br>[6.2-18.5]  | 8 (12.7)<br>[6.6-23.1]   | 3 (7.9)<br>[2.7-20.8]   | 0.528 | 27 (26.7)<br>[19.1-36.1] | 20 (31.7)<br>[21.6-44.0] | 7 (18.4)<br>[9.2-33.4] | 0.169 | 32 (31.7)<br>[23.4-41.3] | 25 (39.7)<br>[28.5-52.0] | 7 (18.4)<br>[9.2-33.4] | 0.029 |
| Aminoglycosides                                              | 0 (0.0)<br>[0.0-3.7]     | 0 (0.0)<br>[0.0-5.7]     | 0 (0.0)<br>[0.0-9.2]    | NA    | 0 (0.0)<br>[0.0-3.7]     | 0 (0.0)<br>[0.0-5.7]     | 0 (0.0)<br>[0.0-9.2]   | NA    | 1 (1.0)<br>[0.2-5.4]     | 1 (1.6)<br>[0.3-8.5]     | 0 (0.0)<br>[0.0-9.2]   | 1.000 |
| β-lactams                                                    | 10 (9.9)<br>[5.5-17.3]   | 7 (11.1)<br>[5.5-21.2]   | 3 (7.9)<br>[2.7-20.8]   | 0.739 | 25 (24.8)<br>[17.4-34.0] | 19 (30.2)<br>[20.2-42.4] | 6 (15.8)<br>[7.4-30.4] | 0.153 | 30 (29.7)<br>[21.7-39.2] | 24 (38.1)<br>[27.1-50.4] | 6 (15.8)<br>[7.4-30.4] | 0.024 |
| Glycopeptides                                                | 1 (1.0)<br>[0.2-5.4]     | 1 (1.6)<br>[0.3-8.5]     | 0 (0.0)<br>[0.0-9.2]    | 1.000 | 2 (2.0)<br>[0.5-6.9]     | 2 (3.2)<br>[0.9-10.9]    | 0 (0.0)<br>[0.0-9.2]   | 0.526 | 2 (2.0)<br>[0.5-6.9]     | 2 (3.2)<br>[0.9-10.9]    | 0 (0.0)<br>[0.0-9.2]   | 0.526 |

|                                                                       |                          |                          |                          |       |                          |                          |                          |       |                          |                          |                          |       |
|-----------------------------------------------------------------------|--------------------------|--------------------------|--------------------------|-------|--------------------------|--------------------------|--------------------------|-------|--------------------------|--------------------------|--------------------------|-------|
| Macrolides                                                            | 0 (0.0)<br>[0.0-3.7]     | 0 (0.0)<br>[0.0-5.7]     | 0 (0.0)<br>[0.0-9.2]     | NA    | 0 (0.0)<br>[0.0-3.7]     | 0 (0.0)<br>[0.0-5.7]     | 0 (0.0)<br>[0.0-9.2]     | NA    | 1 (1.0)<br>[0.2-5.4]     | 1 (1.6)<br>[0.3-8.5]     | 0 (0.0)<br>[0.0-9.2]     | 1.000 |
| Chinolones                                                            | 0 (0.0)<br>[0.0-3.7]     | 0 (0.0)<br>[0.0-5.7]     | 0 (0.0)<br>[0.0-9.2]     | NA    | 1 (1.0)<br>[0.2-5.4]     | 0 (0.0)<br>[0.0-5.7]     | 1 (2.6)<br>[0.5-13.5]    | 0.376 | 1 (1.0)<br>[0.2-5.4]     | 0 (0.0)<br>[0.0-5.7]     | 1 (2.6)<br>[0.5-13.5]    | 0.376 |
| Co-trimoxazol                                                         | 0 (0.0)<br>[0.0-3.7]     | 0 (0.0)<br>[0.0-5.7]     | 0 (0.0)<br>[0.0-9.2]     | NA    | 1 (1.0)<br>[0.2-5.4]     | 0 (0.0)<br>[0.0-5.7]     | 1 (2.6)<br>[0.5-13.5]    | 0.376 | 0 (0.0)<br>[0.0-3.7]     | 0 (0.0)<br>[0.0-5.7]     | 0 (0.0)<br>[0.0-9.2]     | NA    |
| <b>Other<br/>postoperative<br/>medication – no.<br/>(%) [95 % CI]</b> |                          |                          |                          |       |                          |                          |                          |       |                          |                          |                          |       |
| ACE inhibitors                                                        | 1 (1.0)<br>[0.2-5.4]     | 0 (0.0)<br>[0.0-5.7]     | 1 (2.6)<br>[0.5-13.5]    | 0.376 | 21 (20.8)<br>[14.0-29.7] | 16 (25.4)<br>[16.3-37.3] | 5 (13.2)<br>[5.8-27.3]   | 0.206 | 21 (20.8)<br>[14.0-29.7] | 15 (23.8)<br>[15.0-35.6] | 6 (15.8)<br>[7.4-30.4]   | 0.450 |
| Diuretics                                                             | 20 (19.8)<br>[13.2-28.6] | 11 (17.5)<br>[10.0-28.6] | 9 (23.7)<br>[13.0-39.2]  | 0.453 | 70 (69.3)<br>[59.7-77.5] | 49 (77.8)<br>[66.1-86.3] | 21 (55.3)<br>[39.7-69.9] | 0.026 | 58 (57.4)<br>[47.7-66.6] | 43 (68.3)<br>[56.0-78.4] | 15 (39.5)<br>[25.6-55.3] | 0.007 |
| Cyclosporine                                                          | 1 (1.0)<br>[0.2-5.4]     | 0 (0.0)<br>[0.0-5.7]     | 1 (2.6)<br>[0.5-13.5]    | 0.376 | 0 (0.0)<br>[0.0-3.7]     | 0 (0.0)<br>[0.0-5.7]     | 0 (0.0)<br>[0.0-9.2]     | NA    | 0 (0.0)<br>[0.0-3.7]     | 0 (0.0)<br>[0.0-5.7]     | 0 (0.0)<br>[0.0-9.2]     | NA    |
| NSAIDs                                                                | 46 (45.5)<br>[36.2-55.2] | 26 (41.3)<br>[30.0-53.6] | 20 (52.6)<br>[37.3-67.5] | 0.306 | 50 (49.5)<br>[40.0-59.1] | 30 (47.6)<br>[35.8-59.7] | 20 (52.6)<br>[37.3-67.5] | 0.684 | 43 (42.6)<br>[33.4-52.3] | 25 (39.7)<br>[28.5-52.0] | 18 (47.4)<br>[32.5-62.7] | 0.534 |
| Corticosteroids                                                       | 17 (16.8)<br>[10.8-25.3] | 11 (17.5)<br>[10.0-28.6] | 6 (15.8)<br>[7.4-30.4]   | 1.000 | 17 (16.8)<br>[10.8-25.3] | 14 (22.2)<br>[13.7-33.9] | 3 (7.9)<br>[2.7-20.8]    | 0.098 | 11 (10.9)<br>[6.2-18.5]  | 8 (12.7)<br>[6.6-23.1]   | 3 (7.9)<br>[2.7-20.8]    | 0.528 |

**Suppl. Table S5: Weight and length according to gender and age in AKI stage  $\geq 1$  versus no AKI patients within 48 hours after ICU admission**

|                   | all                  | AKI stage $\geq 1$<br>within 48-h | No AKI<br>within 48-h | P value |
|-------------------|----------------------|-----------------------------------|-----------------------|---------|
| <b>Female</b>     |                      |                                   |                       |         |
| < 6m              |                      |                                   |                       |         |
| Length (cm)       | 62.0 [56.5-67.0 ]    | 62.0 [57.0-67.0]                  | 60.5 [57.3-63.7]      | 0.582   |
| Weight (kg)       | 5.2 [4.1-6.2 ]       | 5.2 [4.2-6.3]                     | 5.1 [4.6-5.5]         | 0.727   |
| $\geq 6m$ & <3y   |                      |                                   |                       |         |
| Length (cm)       | 78.0 [65.0-85.0]     | 67.0 [65.0-78.0]                  | 80.0 [78.0-82.0]      | 0.181   |
| Weight (kg)       | 9.0 [6.6-10.2 ]      | 6.6 [5.8-9.6]                     | 9.2 [9.0-10.4]        | 0.272   |
| $\geq 3y$ & <5y   |                      |                                   |                       |         |
| Length (cm)       | 90.0 [90.0-90.0]     | -                                 | 90.0 [90.0-90.0]      |         |
| Weight (kg)       | 12.0 [12.0-12.0 ]    | -                                 | 12.0 [12.0-12.0 ]     |         |
| $\geq 5y$ & <10y  |                      |                                   |                       |         |
| Length (cm)       | 113.5 [106.5-121.03] | -                                 | 113.5 [106.5-121.03]  |         |
| Weight (kg)       | 19.6 [16.4-23.4 ]    | -                                 | 19.6 [16.4-23.4 ]     |         |
| $\geq 10y$ & <18y |                      |                                   |                       |         |
| Length (cm)       | 147.0 [145.5-154.0]  | -                                 | 147.0 [145.5-154.0]   |         |
| Weight (kg)       | 37.0 [36.5-42.9 ]    | -                                 | 37.0 [36.5-42.9 ]     |         |
| <b>male</b>       |                      |                                   |                       |         |
| < 6m              |                      |                                   |                       |         |
| Length (cm)       | 64.0 [62.5-68 ]      | 64.5 [61.1-68.5]                  | 63.0 [63.0-63.0]      | 0.769   |
| Weight (kg)       | 6.2 [4.5-7.7]        | 6.3 [4.5-7.7]                     | 6.2 [6.2-6.2]         | 1.000   |
| $\geq 6m$ & <3y   |                      |                                   |                       |         |
| Length (cm)       | 74.0 [68.0-88.0]     | 70.0 [68.0-90.0]                  | 78.0 [71.5-83.5]      | 1.000   |
| Weight (kg)       | 8.6 [7.8-11.0]       | 8.0 [7.2-11.0]                    | 9.3 [8.4-10.6]        | 0.730   |
| $\geq 3y$ & <5y   |                      |                                   |                       |         |
| Length (cm)       | 96.0 [94.5-100.0 ]   | 97.0 [96.0-103.0]                 | 94.5 [93.8-95.3]      | 0.381   |
| Weight (kg)       | 13.4 [13.0-15.1]     | 13.0 [12.9-15.5]                  | 14.0 [13.7-14.3]      | 0.857   |
| $\geq 5y$ & <10y  |                      |                                   |                       |         |
| Length (cm)       | 104.0 [103.5-111.0 ] | 104.0 [103.0-104.5]               | 129.0 [129.0-129.0]   | 0.500   |
| Weight (kg)       | 15.6 [14.9-18.3 ]    | 15.2 [14.6-15.6]                  | 25.0 [25.0-25.0]      | 0.500   |
| $\geq 10y$ & <18y |                      |                                   |                       |         |

|             |                      |                     |                     |       |
|-------------|----------------------|---------------------|---------------------|-------|
| Length (cm) | 166.0 [154.8-174.3 ] | 173.5 [173.3-173.8] | 157.5 [152.3-171.0] | 0.643 |
| Weight (kg) | 56.7 [50.5-65.0 ]    | 61.5 [59.8-63.3]    | 54.3 [45.5-62.7]    | 0.429 |
|             |                      |                     |                     |       |



**Suppl. Table S6: Sensitivity analysis in pediatric patients without AKI  $\geq 1$  or AKI  $\geq 2$  on ICU admission for the respectively AKI prediction by biomarkers measured 4 hours after ICU admission in urine.**

Data is presented as AUC-ROC values and 95% confidence interval. sCr: serum creatinine; CHI3L1: Chitinase-3-like protein 1; uCr: urine creatinine; NGAL: neutrophil gelatinase-associated lipocalin; TIMP-2: tissue inhibitor of metalloproteinases-2; IGFBP7: insulin-like growth factor-binding protein 7; NephroCheck® : AKI risk by analyzing [TIMP-2] and [IGFBP7]. Biomarkers/uCr: correction of the biomarker for urine dilution.

| outcome                    | AKI $\geq 1$ within 48-h after ICU admission<br>AUC-ROC (95% CI) | AKI $\geq 2$ within 12-h after ICU admission<br>AUC-ROC (95% CI) | P value<br>Compared to uCHI3L1/uCr<br>For<br>AKI $\geq 1$ within 48-h after ICU admission | P value<br>Compared to uCHI3L1/uCr<br>For<br>AKI $\geq 2$ within 12-h after ICU admission |
|----------------------------|------------------------------------------------------------------|------------------------------------------------------------------|-------------------------------------------------------------------------------------------|-------------------------------------------------------------------------------------------|
| outcome                    |                                                                  |                                                                  |                                                                                           |                                                                                           |
| CHI3L1                     | 0.584 (0.453-0.707)                                              | 0.544 (0.435-0.650)                                              |                                                                                           |                                                                                           |
| CHI3L1/uCr                 | 0.692 (0.561-0.804)                                              | 0.706 (0.598-0.799)                                              |                                                                                           |                                                                                           |
| NGAL                       | 0.608 (0.477-0.729)                                              | 0.503 (0.395-0.612)                                              |                                                                                           |                                                                                           |
| NGAL/uCr                   | 0.768 (0.642-0.866)                                              | 0.694 (0.585-0.789)                                              | 1.000                                                                                     | 0.847                                                                                     |
| NephroCheck®               | 0.594 (0.447-0.729)                                              | 0.523 (0.399-0.645)                                              |                                                                                           |                                                                                           |
| NephroCheck® /uCr          | 0.705 (0.559-0.825)                                              | 0.760 (0.641-0.855)                                              | 0.492                                                                                     | 0.128                                                                                     |
| TIMP-2                     | 0.508 (0.364-0.651)                                              | 0.514 (0.390-0.636)                                              |                                                                                           |                                                                                           |
| TIMP-2/uCr                 | 0.681 (0.534-0.805)                                              | 0.813 (0.700-0.897)                                              | 0.765                                                                                     | 0.040                                                                                     |
| IGFBP7                     | 0.650 (0.503-0.778)                                              | 0.589 (0.464-0.706)                                              |                                                                                           |                                                                                           |
| IGFBP7/uCr                 | 0.776 (0.636-0.882)                                              | 0.820 (0.708-0.903)                                              | 0.067                                                                                     | 0.001                                                                                     |
| $\Delta$ sCr[postop-preop] | 0.869 (0.722-0.955)                                              | 0.866 (0.743-0.944)                                              | 0.027                                                                                     | 0.001                                                                                     |

**Suppl. Table S7: Sensitivity analysis in pediatric patients without AKI  $\geq 1$  or AKI  $\geq 2$  on ICU admission for the respectively AKI  $\geq 1$  and AKI  $\geq 2$  prediction by biomarker combinations measured 4 hours after ICU admission in urine.**

Data is presented as AUC-ROC values and 95% confidence interval. sCr: serum creatinine; CHI3L1: Chitinase-3-like protein 1; uCr: urine creatinine; NGAL: urine neutrophil gelatinase-associated lipocalin; TIMP-2: tissue inhibitor of metalloproteinases-2; IGFBP7: insulin-like growth factor-binding protein 7; NephroCheck® : AKI risk by analyzing [TIMP-2] and [IGFBP7].

| outcome                       | AKI $\geq 1$ within 48-h after ICU admission<br>AUC-ROC (95% CI) | AKI $\geq 2$ within 12-h after ICU admission<br>AUC-ROC (95% CI) |
|-------------------------------|------------------------------------------------------------------|------------------------------------------------------------------|
| <b>Combinations</b>           |                                                                  |                                                                  |
| <b>All corrected for uCr:</b> |                                                                  |                                                                  |
| [CHI3L1]•[TIMP-2]             | 0.655 (0.504-0.786)                                              | 0.702 (0.574-0.810)                                              |
| [CHI3L1]•[IGFBP7]             | 0.698 (0.549-0.822)                                              | 0.722 (0.596-0.827)                                              |
| [CHI3L1]•[NephroCheck®]       | 0.685 (0.535-0.811)                                              | 0.720 (0.594-0.825)                                              |
| [CHI3L1]•[NGAL]               | 0.698 (0.564-0.812)                                              | 0.654 (0.540-0.756)                                              |
| [NGAL]•[TIMP-2]               | 0.706 (0.557-0.828)                                              | 0.683 (0.554-0.793)                                              |
| [NGAL]•[IGFBP7]               | 0.744 (0.597-0.859)                                              | 0.686 (0.558-0.796)                                              |
| [NGAL]•[NephroCheck®]         | 0.717 (0.569-0.838)                                              | 0.664 (0.535-0.777)                                              |
